# Supplementary material for: A structured ICA-based process for removing auditory evoked potentials
Source: PubMed Central journal article supplement (PMC8791940; doi:10.1038/s41598-022-05397-3), 2022-01-26
Supplement: 41598_2022_5397_MOESM1_ESM.pdf [file 41598_2022_5397_MOESM1_ESM.pdf]

## Supplementary

*Non-parametric permutation based suprathreshold cluster size analysis:* This analysis was performed on GMFP of the sham condition, following [73]. N clusters were identified that are greater than baseline (at alpha level of 0.01) for all consecutive samples in at least 5 ms. Cluster sums were calculated for each of those n clusters. Pre (-400 to -14 ms) and post-TMS (14 to 400 ms) time courses were shuffled 1000 times, and 95% and 99% cluster-sum values were calculated in each shuffled dataset. In the un-shuffled dataset, clusters greater than the 99<sup>th</sup> percentile were identified. Percent variance (pvaf) was calculated for each identified cluster. We removed the peak pvaf contributor, and then reassessed cluster sums, iteratively with the notion that eventually all clusters significantly greater than baseline would be removed.

In the young adult cohort, after four iterations, it became apparent that removing components in this way was reducing GMFP in the baseline window as well as in the post-TMS window, resulting in new significant clusters with more iterations. We found that the components identified in the first or first and second iterations were the same components identified using the percent variance threshold for components contributing most to the mid latency window, described above. In the older cohort, we used the same cluster size analysis, removing components in four iterations. We found that removing these components reduced GMFP in the baseline window as well as in the post-TMS window, resulting in new significant clusters with more iterations.

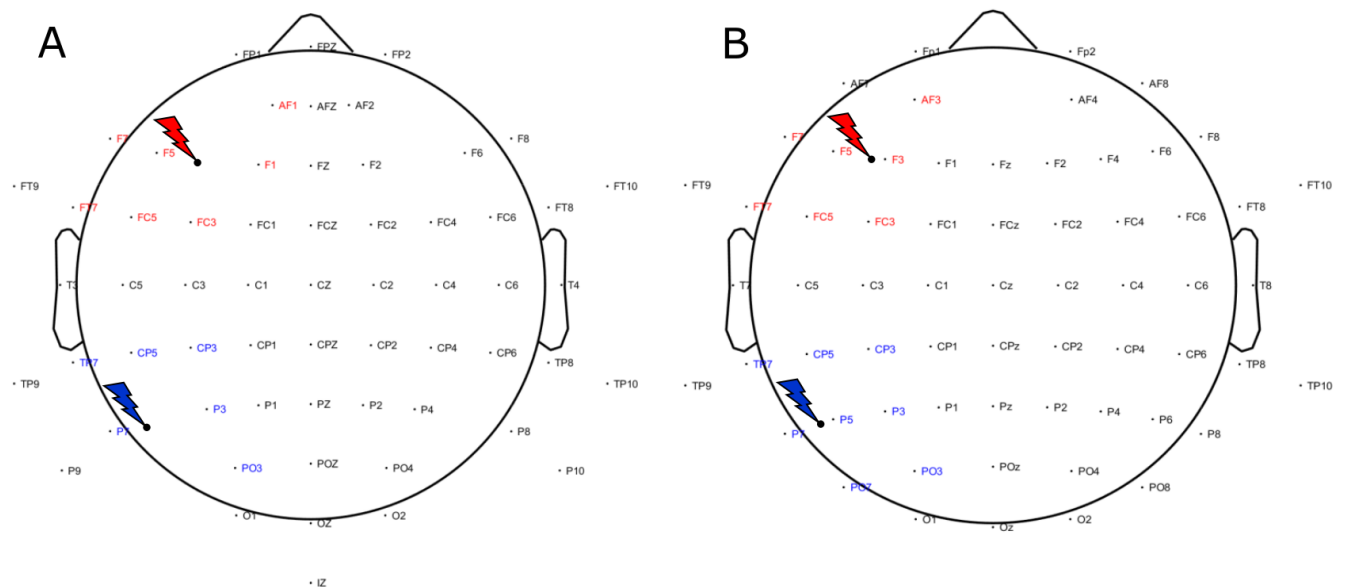

Figure S1. Electrode arrays used with the young adult cohort (A) and the older SAGES cohort (B). Electrodes are color coded to indicate ROI used in the LMFP analysis for L DLPFC (red) and L IPL (blue).

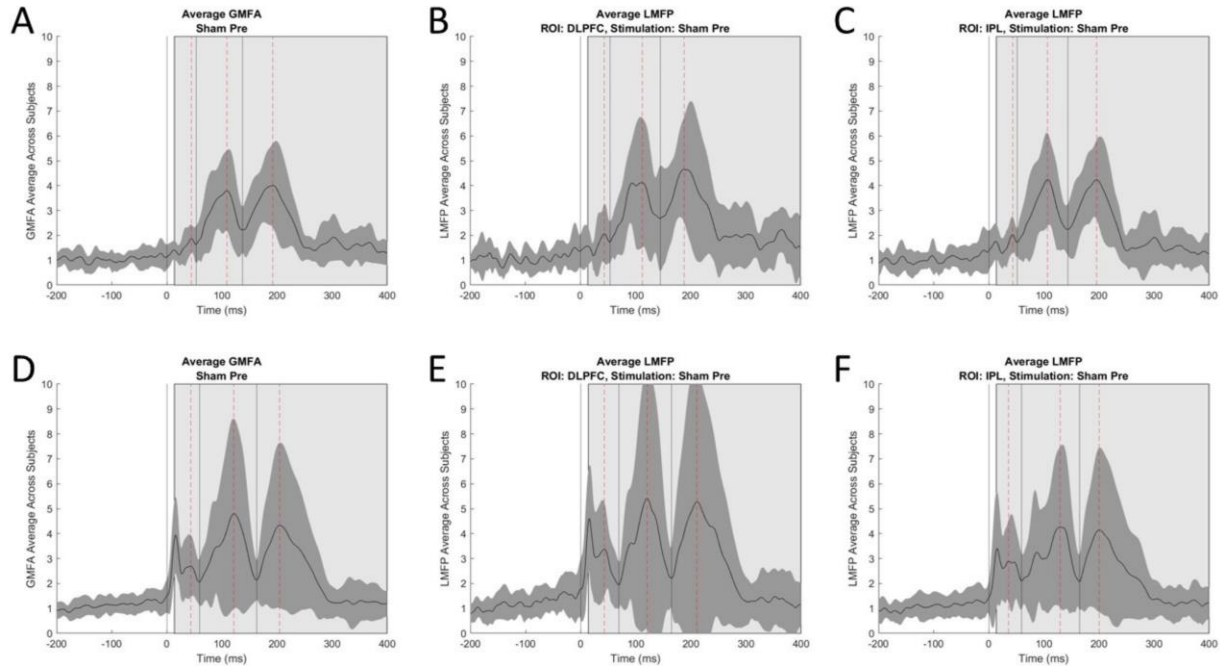

Figure S2. Time windows used to assess reduction in GMFP and LMFP AUC in time ranges corresponding to the three subcomponents of the Auditory Evoked Potential (AEP). Windows were defined in each study cohort for GMFP, LMFP of the DLPFC ROI, and LMFP of the IPL ROI, using latency of the minimum amplitude between peaks (amplitudes greater than two standard deviations above baseline) in the sham stimulation condition. Sham stimulation pre-AEP removal peaks (red lines) and troughs (black) used to define windows in the young adult cohort for GMFP (A), DLPFC ROI (B), and IPL ROI (C), and in the older SAGES cohort for GMFP (D), DLPFC ROI (E), and IPL ROI (F).

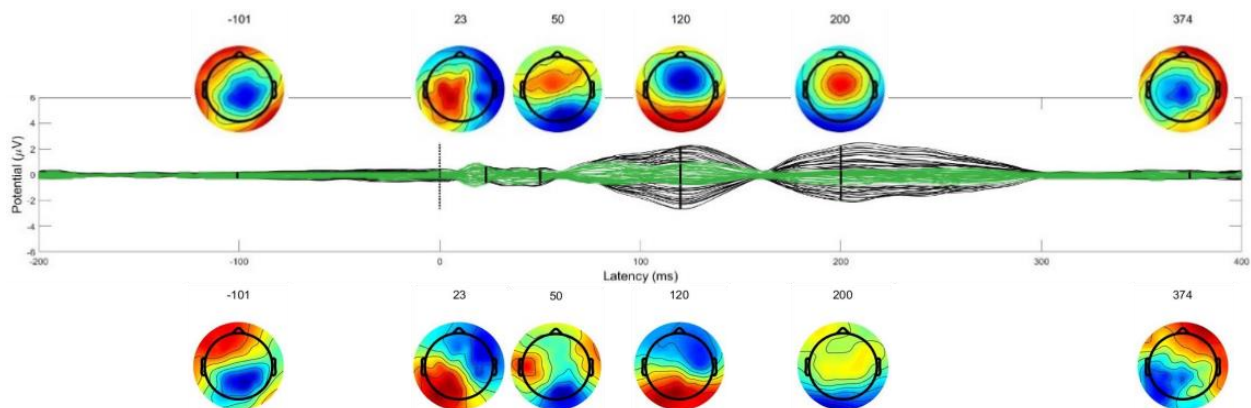

Figure S3. Sham condition TEPs/topography pre (black/above) and post (blue/below) removal of AEP components. Topoplots are greyscale if no peak is present at the indicated latency.

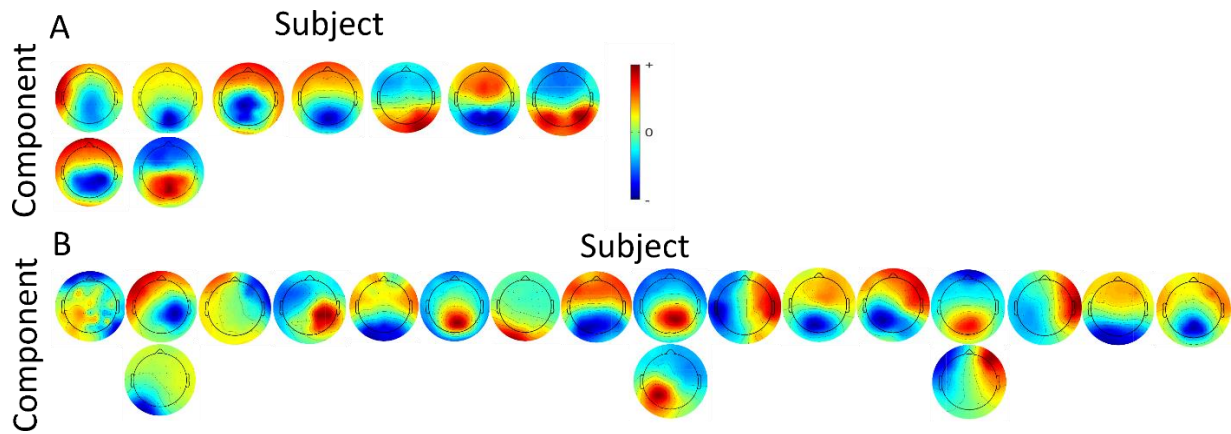

Figure S4. Components contributing the highest percent variance in the mid latency window, determined using a pvaf threshold of 28% in the (A) young adult cohort and (B) older cohort.

| SI of AEP |           | Cohort 1   |             |           |         | Cohort 2 (Older) |             |           |         |
|-----------|-----------|------------|-------------|-----------|---------|------------------|-------------|-----------|---------|
|           |           | IPL, DLPFC | Sham, DLPFC | Sham, IPL | Average | IPL, DLPFC       | Sham, DLPFC | Sham, IPL | Average |
| Btw. Site | Mean      | 0.86       | 0.81        | 0.83      | 0.83    | 0.68             | 0.65        | 0.64      | 0.66    |
|           | Std. Err. | 0.03       | 0.03        | 0.06      | 0.01    | 0.07             | 0.06        | 0.05      | 0.01    |

  

| Extracted from --> |      | DLPFC      | IPL  | Sham | Average | DLPFC | IPL  | Sham | Average |
|--------------------|------|------------|------|------|---------|-------|------|------|---------|
|                    |      | Btw. Subj. | Mean | 0.49 | 0.53    | 0.47  | 0.49 | 0.42 | 0.35    |
| Std. Err.          | 0.03 |            | 0.03 | 0.03 | 0.02    | 0.02  | 0.02 | 0.02 | 0.03    |

Table S1. Similarity of AEP components extracted from each stimulation condition. Similarity index averages and standard error for all between-site comparisons and within-site between-subject comparisons of the removed AEP components.

| GMFA              |        | Cohort 1 |            |             | Cohort 2 (Older) |            |             |
|-------------------|--------|----------|------------|-------------|------------------|------------|-------------|
|                   |        | Pre/Post | Stim. Site | Interaction | Pre/Post         | Stim. Site | Interaction |
| Full TEP          | F Stat | 21.78    | 8.61       | 2.28        | 29.27            | 7.75       | 6.04        |
|                   | P-Val  | 0.001    | 0.002      | 0.13        | <0.0001          | 0.002      | 0.005       |
| P50               | F Stat | < 0.0001 | 10.90      | 1.41        | 1.18             | 2.34       | 0.41        |
|                   | P-Val  | 0.99     | 0.001      | 0.27        | 0.29             | 0.11       | 0.67        |
| N100              | F Stat | 9.14     | 7.89       | 0.16        | 21.08            | 4.16       | 6.63        |
|                   | P-Val  | 0.014    | 0.003      | 0.86        | <0.0001          | 0.023      | 0.003       |
| P200              | F Stat | 20.49    | 6.87       | 5.65        | 31.26            | 9.72       | 4.58        |
|                   | P-Val  | 0.001    | 0.006      | 0.012       | <0.0001          | <0.0001    | 0.017       |
| <b>LMFA DLPFC</b> |        |          |            |             |                  |            |             |
| Full TEP          | F Stat | 13.41    | 5.64       | 1.73        | 18.35            | 5.89       | 5.99        |
|                   | P-Val  | 0.005    | 0.013      | 0.21        | <0.0001          | 0.006      | 0.006       |
| P50               | F Stat | 0.47     | 7.17       | 2.57        | 0.014            | 0.77       | 0.42        |
|                   | P-Val  | 0.51     | 0.005      | 0.10        | 0.91             | 0.47       | 0.66        |
| N100              | F Stat | 6.61     | 4.86       | 0.75        | 19.50            | 4.22       | 5.37        |
|                   | P-Val  | 0.030    | 0.021      | 0.49        | <0.0001          | 0.022      | 0.009       |
| P200              | F Stat | 17.93    | 3.02       | 2.73        | 15.42            | 7.42       | 3.32        |
|                   | P-Val  | 0.002    | 0.074      | 0.092       | 0.001            | 0.002      | 0.047       |
| <b>LMFA IPL</b>   |        |          |            |             |                  |            |             |
| Full TEP          | F Stat | 27.70    | 7.28       | 2.46        | 16.89            | 10.43      | 4.55        |
|                   | P-Val  | 0.001    | 0.005      | 0.11        | 0.001            | <0.0001    | 0.017       |
| P50               | F Stat | 0.090    | 4.43       | 0.31        | 1.08             | 3.28       | 0.029       |
|                   | P-Val  | 0.77     | 0.027      | 0.74        | 0.31             | 0.048      | 0.97        |
| N100              | F Stat | 4.58     | 3.73       | 0.041       | 16.69            | 3.24       | 4.41        |
|                   | P-Val  | 0.061    | 0.044      | 0.96        | 0.001            | 0.050      | 0.019       |
| P200              | F Stat | 26.69    | 8.92       | 5.92        | 13.49            | 12.29      | 2.73        |
|                   | P-Val  | 0.001    | 0.002      | 0.011       | 0.002            | <0.0001    | 0.078       |

|  |             |
|--|-------------|
|  | Sig. < .01  |
|  | Sig. < .05  |
|  | Sig. < .004 |

Table S2. F-statistics and p-values from 2 (version: pre/post-AEP removal) by 3 (stimulation site: DLPFC/IPL/sham) repeated measures ANOVAs of global and local mean field potential area under the curve for the full TEP (14-400 ms), and in three windows corresponding by the three subcomponents of the AEP (P50, N100, P200), defined using sham condition peak/trough analysis.

| Btw. Subj. SI |           | Cohort 1 |      |      |      |      |      |         |      | Cohort 2 (Older) |      |      |      |      |      |         |      |        |  |
|---------------|-----------|----------|------|------|------|------|------|---------|------|------------------|------|------|------|------|------|---------|------|--------|--|
|               |           | DLPFC    |      | IPL  |      | Sham |      | Average |      | DLPFC            |      | IPL  |      | Sham |      | Average |      |        |  |
|               |           | Pre      | Post | Pre  | Post | Pre  | Post | Pre     | Post | Pre              | Post | Pre  | Post | Pre  | Post | Pre     | Post |        |  |
| Full TEP      | Mean      | 0.48     | 0.14 | 0.50 | 0.14 | 0.46 | 0.18 | 0.48    | 0.15 | 0.42             | 0.18 | 0.39 | 0.19 | 0.30 | 0.13 | 0.37    | 0.16 |        |  |
|               | Std. Err. | 0.02     | 0.03 | 0.02 | 0.02 | 0.02 | 0.03 | 0.01    | 0.01 | 0.01             | 0.01 | 0.01 | 0.01 | 0.02 | 0.01 | 0.04    | 0.02 |        |  |
|               | T-Stat    |          |      |      |      |      |      |         |      | 17.83            |      |      |      |      |      |         |      | 5.03   |  |
|               | P-Value   |          |      |      |      |      |      |         |      | 0.000029         |      |      |      |      |      |         |      | 0.0037 |  |

| Btw. Site SI |           | IPL, DLPFC |      | Sham, DLPFC |      | Sham, IPL |      | Average |          | IPL, DLPFC |      | Sham, DLPFC |      | Sham, IPL |      | Average |        |        |      |
|--------------|-----------|------------|------|-------------|------|-----------|------|---------|----------|------------|------|-------------|------|-----------|------|---------|--------|--------|------|
|              |           | Pre        | Post | Pre         | Post | Pre       | Post | Pre     | Post     | Pre        | Post | Pre         | Post | Pre       | Post | Pre     | Post   |        |      |
|              |           | Full TEP   | Mean | 0.74        | 0.50 | 0.68      | 0.44 | 0.72    | 0.46     | 0.71       | 0.47 | 0.63        | 0.41 | 0.58      | 0.39 | 0.53    | 0.32   | 0.58   | 0.37 |
| Std. Err.    | 0.05      |            | 0.05 | 0.05        | 0.04 | 0.04      | 0.05 | 0.02    | 0.02     | 0.05       | 0.04 | 0.06        | 0.05 | 0.05      | 0.05 | 0.03    | 0.03   |        |      |
| T-Stat       |           |            |      |             |      |           |      |         | 9.17     |            |      |             |      |           |      |         | 5.29   |        |      |
| P-Value      |           |            |      |             |      |           |      |         | 0.000029 |            |      |             |      |           |      |         | 0.0031 |        |      |
| Early        | Mean      | 0.29       | 0.17 | 0.33        | 0.19 | 0.54      | 0.35 | 0.39    | 0.24     | 0.30       | 0.18 | 0.28        | 0.26 | 0.23      | 0.13 | 0.27    | 0.19   |        |      |
|              | Std. Err. | 0.12       | 0.09 | 0.12        | 0.11 | 0.07      | 0.07 | 0.08    | 0.06     | 0.07       | 0.05 | 0.07        | 0.06 | 0.07      | 0.07 | 0.02    | 0.04   |        |      |
|              | T-Stat    |            |      |             |      |           |      |         |          | 1.61       |      |             |      |           |      |         |        | 1.98   |      |
|              | P-Value   |            |      |             |      |           |      |         |          | 0.092      |      |             |      |           |      |         |        | 0.060  |      |
| Mid          | Mean      | 0.84       | 0.64 | 0.77        | 0.51 | 0.82      | 0.55 | 0.81    | 0.57     | 0.77       | 0.59 | 0.71        | 0.49 | 0.67      | 0.45 | 0.72    | 0.51   |        |      |
|              | Std. Err. | 0.04       | 0.05 | 0.04        | 0.04 | 0.03      | 0.07 | 0.02    | 0.04     | 0.04       | 0.05 | 0.04        | 0.05 | 0.05      | 0.05 | 0.03    | 0.04   |        |      |
|              | T-Stat    |            |      |             |      |           |      |         |          | 5.68       |      |             |      |           |      |         |        | 4.17   |      |
|              | P-Value   |            |      |             |      |           |      |         |          | 0.0024     |      |             |      |           |      |         |        | 0.0070 |      |
| Late         | Mean      | 0.51       | 0.40 | 0.40        | 0.36 | 0.34      | 0.28 | 0.42    | 0.35     | 0.27       | 0.24 | 0.21        | 0.17 | 0.24      | 0.23 | 0.24    | 0.21   |        |      |
|              | Std. Err. | 0.09       | 0.11 | 0.12        | 0.11 | 0.09      | 0.06 | 0.05    | 0.03     | 0.07       | 0.07 | 0.06        | 0.07 | 0.08      | 0.08 | 0.02    | 0.02   |        |      |
|              | T-Stat    |            |      |             |      |           |      |         |          | 1.15       |      |             |      |           |      |         |        | 1.00   |      |
|              | P-Value   |            |      |             |      |           |      |         |          | 0.16       |      |             |      |           |      |         |        | 0.19   |      |

Sig. < .01  
 Sig. < .05

Table S3. Similarity index averages and standard error for all between-site comparisons and within-site between-subject comparisons of TEPs pre- and post-AEP removal.

| SI of Mid Latency ICs |           | Cohort 1   |             |           |         | Cohort 2 (Older) |             |           |         |
|-----------------------|-----------|------------|-------------|-----------|---------|------------------|-------------|-----------|---------|
|                       |           | IPL, DLPFC | Sham, DLPFC | Sham, IPL | Average | IPL, DLPFC       | Sham, DLPFC | Sham, IPL | Average |
| Btw. Site             | Mean      | 0.59       | 0.46        | 0.53      | 0.53    | 0.35             | 0.34        | 0.29      | 0.33    |
|                       | Std. Err. | 0.04       | 0.07        | 0.09      | 0.04    | 0.07             | 0.06        | 0.07      | 0.02    |

  

| Extracted from --> |           | DLPFC | IPL  | Sham | Average | DLPFC | IPL  | Sham | Average |
|--------------------|-----------|-------|------|------|---------|-------|------|------|---------|
| Btw. Subj.         | Mean      | 0.08  | 0.18 | 0.09 | 0.12    | 0.08  | 0.15 | 0.08 | 0.10    |
|                    | Std. Err. | 0.05  | 0.06 | 0.06 | 0.03    | 0.02  | 0.02 | 0.02 | 0.03    |

Table S4. Similarity of residual mid latency components identified in each stimulation condition. Similarity index averages and standard error for all between-site comparisons and within-site between-subject comparisons of the residual mid latency components.

| Btw. Subj. SI |           | Cohort 1   |      |             |      |           |      |         |      | Cohort 2 (Older) |      |             |      |           |      |         |      |       |  |
|---------------|-----------|------------|------|-------------|------|-----------|------|---------|------|------------------|------|-------------|------|-----------|------|---------|------|-------|--|
|               |           | DLPFC      |      | IPL         |      | Sham      |      | Average |      | DLPFC            |      | IPL         |      | Sham      |      | Average |      |       |  |
|               |           | Pre        | Post | Pre         | Post | Pre       | Post | Pre     | Post | Pre              | Post | Pre         | Post | Pre       | Post | Pre     | Post |       |  |
| Full TEP      | Mean      | 0.14       | 0.11 | 0.14        | 0.08 | 0.18      | 0.14 | 0.15    | 0.11 | 0.18             | 0.14 | 0.19        | 0.09 | 0.13      | 0.08 | 0.16    | 0.11 |       |  |
|               | Std. Err. | 0.03       | 0.02 | 0.02        | 0.02 | 0.03      | 0.02 | 0.01    | 0.02 | 0.01             | 0.01 | 0.01        | 0.01 | 0.01      | 0.01 | 0.01    | 0.02 | 0.02  |  |
|               | T-Stat    |            |      |             |      |           |      |         |      | 1.89             |      |             |      |           |      |         |      | 2.21  |  |
|               | P-Value   |            |      |             |      |           |      |         |      | 0.066            |      |             |      |           |      |         |      | 0.046 |  |
| Btw. Site SI  |           | IPL, DLPFC |      | Sham, DLPFC |      | Sham, IPL |      | Average |      | IPL, DLPFC       |      | Sham, DLPFC |      | Sham, IPL |      | Average |      |       |  |
|               |           | Pre        | Post | Pre         | Post | Pre       | Post | Pre     | Post | Pre              | Post | Pre         | Post | Pre       | Post | Pre     | Post |       |  |
|               |           | IPL, DLPFC |      | Sham, DLPFC |      | Sham, IPL |      | Average |      | IPL, DLPFC       |      | Sham, DLPFC |      | Sham, IPL |      | Average |      |       |  |
| Full TEP      | Mean      | 0.50       | 0.44 | 0.44        | 0.38 | 0.46      | 0.44 | 0.47    | 0.42 | 0.41             | 0.41 | 0.39        | 0.36 | 0.32      | 0.29 | 0.37    | 0.35 |       |  |
|               | Std. Err. | 0.05       | 0.07 | 0.04        | 0.06 | 0.05      | 0.04 | 0.02    | 0.02 | 0.04             | 0.05 | 0.05        | 0.06 | 0.05      | 0.06 | 0.03    | 0.04 |       |  |
|               | T-Stat    |            |      |             |      |           |      |         |      | 1.85             |      |             |      |           |      |         |      | 0.48  |  |
|               | P-Value   |            |      |             |      |           |      |         |      | 0.069            |      |             |      |           |      |         |      | 0.33  |  |
| Early         | Mean      | 0.17       | 0.14 | 0.19        | 0.22 | 0.35      | 0.30 | 0.24    | 0.22 | 0.18             | 0.17 | 0.26        | 0.22 | 0.13      | 0.14 | 0.19    | 0.18 |       |  |
|               | Std. Err. | 0.09       | 0.07 | 0.11        | 0.07 | 0.07      | 0.08 | 0.06    | 0.05 | 0.05             | 0.06 | 0.06        | 0.07 | 0.07      | 0.07 | 0.04    | 0.02 |       |  |
|               | T-Stat    |            |      |             |      |           |      |         |      | 0.24             |      |             |      |           |      |         |      | 0.20  |  |
|               | P-Value   |            |      |             |      |           |      |         |      | 0.41             |      |             |      |           |      |         |      | 0.42  |  |
| Mid           | Mean      | 0.64       | 0.55 | 0.51        | 0.44 | 0.55      | 0.54 | 0.57    | 0.51 | 0.59             | 0.57 | 0.49        | 0.46 | 0.45      | 0.41 | 0.51    | 0.48 |       |  |
|               | Std. Err. | 0.05       | 0.06 | 0.04        | 0.07 | 0.07      | 0.04 | 0.04    | 0.03 | 0.05             | 0.04 | 0.05        | 0.06 | 0.05      | 0.05 | 0.04    | 0.05 |       |  |
|               | T-Stat    |            |      |             |      |           |      |         |      | 1.14             |      |             |      |           |      |         |      | 0.45  |  |
|               | P-Value   |            |      |             |      |           |      |         |      | 0.16             |      |             |      |           |      |         |      | 0.34  |  |
| Late          | Mean      | 0.40       | 0.50 | 0.36        | 0.38 | 0.28      | 0.32 | 0.35    | 0.40 | 0.24             | 0.26 | 0.17        | 0.22 | 0.23      | 0.25 | 0.21    | 0.24 |       |  |
|               | Std. Err. | 0.11       | 0.08 | 0.11        | 0.07 | 0.06      | 0.06 | 0.03    | 0.05 | 0.07             | 0.07 | 0.07        | 0.07 | 0.08      | 0.07 | 0.02    | 0.01 |       |  |
|               | T-Stat    |            |      |             |      |           |      |         |      | -0.83            |      |             |      |           |      |         |      | -1.12 |  |
|               | P-Value   |            |      |             |      |           |      |         |      | 0.23             |      |             |      |           |      |         |      | 0.16  |  |

 Sig. < .01  
 Sig. < .05

Table S5. Mid latency components similarity averages and standard error for all between-site comparisons and within-site between-subject comparisons pre- and post- removal of mid latency components.
